# Supplementary material for: Generation of a Broadly Cross-Neutralizing Antibody Fragment against Several Mexican Scorpion Venoms
Source: PubMed Central journal article supplement (PMC6356842; doi:10.3390/toxins11010032), 2019-01-10
Supplement: toxins-11-00032-s001.pdf [file toxins-11-00032-s001.pdf]

## Supplementary Materials: Generation of a Broadly Cross-Neutralizing Antibody Fragment against Several Mexican Scorpion Venoms

Lidia Riaño-Umbarila, Ilse V. Gómez-Ramírez, Luis M. Ledezma-Candanoza, Timoteo Olamendi-Portugal, Everardo Remi Rodríguez-Rodríguez, Guillermo Fernández-Taboada, Lourival D. Possani and Baltazar Becerril

**Table S1.** Comparative  $\Delta G^\circ$  of dissociation of scFvs 10FG2 and ER-1.

| Toxin | scFv 10FG2                                                 | ScFv ER-1                                                  |
|-------|------------------------------------------------------------|------------------------------------------------------------|
|       | $\Delta G^\circ$ of dissociation in Kcal·mol <sup>-1</sup> | $\Delta G^\circ$ of dissociation in Kcal·mol <sup>-1</sup> |
| Cll1  | 13.1                                                       | 12.1                                                       |
| Cn2   | 12.5                                                       | 12.3                                                       |
| Cll2  | 11.4                                                       | 11.2                                                       |
| Ct1a  | 11.0                                                       | 10.3                                                       |

**Table S2.**  $\Delta G^\circ$  of binding and hydrogen bonds average of 10FG2 and its revertant mutants with Cll1 and Ct1a toxins.

|      | scFv 10FG2                                               |      | scFv 10FG2 S107A                                         |      | scFv 10FG2 S164I                                         |      | scFv 10FG2 G204A                                         |      | scFv10FG2 T235L/I236L                                    |      |
|------|----------------------------------------------------------|------|----------------------------------------------------------|------|----------------------------------------------------------|------|----------------------------------------------------------|------|----------------------------------------------------------|------|
|      | $\Delta G^\circ_{\text{bind}}$ (Kcal·mol <sup>-1</sup> ) | H.B. | $\Delta G^\circ_{\text{bind}}$ (Kcal·mol <sup>-1</sup> ) | H.B. | $\Delta G^\circ_{\text{bind}}$ (Kcal·mol <sup>-1</sup> ) | H.B. | $\Delta G^\circ_{\text{bind}}$ (Kcal·mol <sup>-1</sup> ) | H.B. | $\Delta G^\circ_{\text{bind}}$ (Kcal·mol <sup>-1</sup> ) | H.B. |
| Cll1 | -8.3                                                     | 10.0 | -8.4                                                     | 9.7  | -5.9                                                     | 9.0  | -6.9                                                     | 10.7 | -8.1                                                     | 9.7  |
| Ct1a | -6.0                                                     | 11.0 | -5.5                                                     | 10.1 | -3.7                                                     | 7.2  | -3.8                                                     | 10.0 | -7.9                                                     | 8.9  |

$\Delta G^\circ_{\text{bind}}$  represents the Gibbs free energy of binding calculated from MD simulations. H.B. represents the hydrogen bonds average along MD Simulations.
